# Supplementary material
Source: Elsevier journal article supplement (https://researchonline.lshtm.ac.uk/id/eprint/2225/1/mmc6.pdf)
Supplement: mmc6 [file mmc6.pdf]

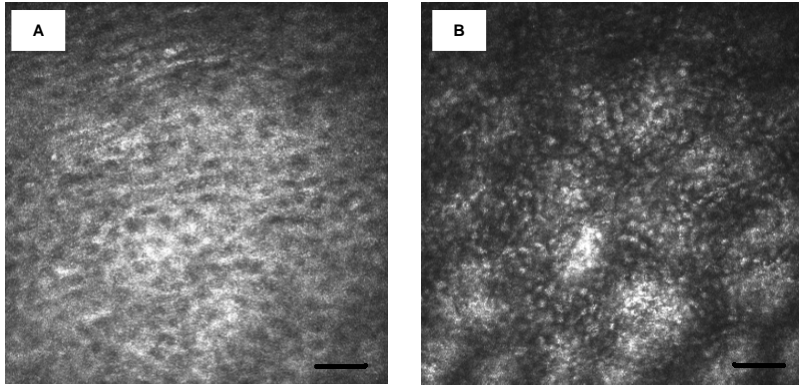

**Figure 9.** Lid margin epithelium. Images are 400×400µm with the bar representing 50µm. **A**, superficial epithelium. **B**, deeper epithelium.
